# Supplementary material
Source: publisher figshare collection journal article supplement (https://gsajournals.figshare.com/ndownloader/files/25484207)
Supplement: Supplementary file 1 [file 25484207]

## Sheet: Additional Strains utilized
Strain	Genotype	Reference or source
H99	α WT	Ref 1
LK65	α CDC3::NAT	Ref 2
LK141	a CDC3-mCherry::NEO	Ref 2
LK158	a CDC3::NAT CDC10-mCherry:NEO	Ref 2
LK162	α CDC12::NEO	Ref 2
LK174	a CDC12::NEO	Ref 2
PS100	CNAG_04124Δ::NAT, CDC12::NEO	This study
PS101	CNAG_04108Δ::NAT, CDC12::NEO	This study
PS103	CNAG_01918Δ::NAT, CDC12::NEO	This study
PS104	CNAG_06648Δ::NAT, CDC12::NEO	This study
PS105	CNAG_02891Δ::NAT, CDC12::NEO	This study
PS107	CNAG_01870Δ::NAT, CDC12::NEO	This study
PS109	CNAG_02196Δ::NAT, CDC12::NEO	This study
PS111	CNAG_06997Δ::NAT, CDC12::NEO	This study
PS116	CNAG_02270Δ::NAT, CDC12::NEO	This study
PS117	CNAG_05843Δ::NAT, CDC12::NEO	This study
PS118	CNAG_05926Δ::NAT, CDC12::NEO	This study
PS201	CNAG_04108Δ::NAT, CDC3-mCherry::NEO	This study
PS203	CNAG_01918Δ::NAT, CDC3-mCherry::NEO	This study
PS205	CNAG_02891Δ::NAT, CDC3-mCherry::NEO	This study
PS207	CNAG_01870Δ::NAT, CDC3-mCherry::NEO	This study
PS208	CNAG_02196Δ::NAT, CDC3-mCherry::NEO	This study
PS209	CNAG_00888Δ::NAT, CDC3-mCherry::NEO	This study
PS213	CNAG_06997Δ::NAT, CDC3-mCherry::NEO	This study
PS215	CNAG_02270Δ::NAT, CDC3-mCherry::NEO	This study
PS217	CNAG_05843Δ::NAT, CDC3-mCherry::NEO	This study
PS221	CNAG_07636Δ::NAT, CDC3-mCherry::NEO	This study
PS223	CNAG_06648Δ::NAT, CDC3-mCherry::NEO	This study
PS238	CNAG_01647Δ::NAT, CDC3-mCherry::NEO	This study
PS246	CNAG_04124Δ::NAT, CDC3-mCherry::NEO	This study
PS250	CNAG_01126Δ::NAT, CDC3-mCherry::NEO	This study
PS251	CNAG_03567Δ::NAT, CDC3-mCherry::NEO	This study
PS253	CNAG_05926Δ::NAT, CDC3-mCherry::NEO	This study
PS255	CNAG_05791Δ::NAT, CDC3-mCherry::NEO	This study
Ref 1: Perfect JR, Lang SD, Durack DT. Chronic cryptococcal meningitis: a new experimental model in rabbits. The American journal of pathology. 1980;101(1):177-94.
Ref 2: Kozubowski L, Heitman J. Septins Enforce Morphogenetic Events during Sexual Reproduction and Contribute to Virulence of Cryptococcus neoformans. Molecular microbiology. 2009

## Sheet: YPD Temperature assays
CNAG Number	Position	SA 37°C #1	SA 37°C #2	TmaxR #1	TmaxR #2	TmaxR #3	Average	St. dev	T Test
CNAG_02270	9C9	*	**	86.885	86.08	90.2793	87.7481	1.81977	0.00542567	*
CNAG_03567	16D8	*?	**	86.9955	90.76	85.31	87.6885	2.27827	0.00834733	*
CNAG_01918	13F1	*	**	86.1905	88.479	87.64	87.4365	0.945303	0.00140936	*
CNAG_01870	24 E7	*	**	80.2752	81.188	92.42	84.6277	5.52254	0.0294445	*
CNAG_01126	3H2	****	***	86.97	84.87	80.29	84.0433	2.78904	0.00746709	*
CNAG_05794	36G5	*?	***	79.693	82.018	87.111	82.9407	3.09787	0.00804562	*
CNAG_02891	19C6	*?	*?	85.5769	75.109	85.65	82.112	4.95194	0.0181234	*
CNAG_07636	17D2	*?	*	79.835	75.439	79.387	78.2203	1.97519	0.00204355	*
CNAG_04124	7C5	*?	*	73.653	72.84	79.16	75.2177	2.80734	0.00317753	*
CNAG_00888	15G1	*	*	73.991	77.83	70	73.9403	3.19679	0.00372016	*
CNAG_01647	33 E9	**	*?	66.284	70.139	69.298	68.5737	1.65504	0.000691941	*
CNAG_05791	36G4	*?	*	71.3568	68.778	65.055	68.3966	2.58679	0.00166655	*
CNAG_01740	cdc12Δ	NA	NA	65.039	63.671	66.434	65.048	1.12801	0.000260184	*
CNAG_03584	29D3	*	****	94.9772	96.1036	88.7	93.2603	3.25721	0.0498167	*
CNAG_02930	6 E12	***	*	88.9328	92.09	93.75	91.5909	1.99802	0.013543	*
CNAG_06648	18C3	*	**	85.714	92.574	95.37	91.2193	4.05676	0.0461018	*
CNAG_02822	7D7	*?	****	84.1897	94.088	92.608	90.2952	4.35933	0.0439019	*
CNAG_00438	21D8	*?	**	89.82	91.667	87.5	89.6623	1.70482	0.00666349	*
CNAG_01536	23F8	*?	*?	87.302	93.069	86.29	88.887	2.98584	0.0171254	*
CNAG_00668	7D8	*?	****	83.7945	93.103	88.4	88.4325	3.80026	0.0249781	*
CNAG_04283	8D5	**	*	93.8967	84.2364	86.87	88.3344	4.07747	0.0280015	*
CNAG_00137	4G3	*?	**	88.3721	83.84	92.15	88.1207	3.3972	0.0192713	*
CNAG_05277	13G2	**	***	88.5714	85.597	89.41	87.8595	1.63603	0.00447901	*
CNAG_03079	4C4	*?	*	89.3023	83.743	88.3469	87.1307	2.42704	0.00866139	*
CNAG_05843	0H5	*	**	88.024	87.243	85.48	86.9157	1.06406	0.00164522	*
CNAG_04514	7D6	*?	*	85.9729	81.22	91.67	86.2876	4.272	0.0226301	*
CNAG_03008	27G8	*	**	80.2752	82.353	93.68	85.4361	5.89073	0.0364802	*
CNAG_03665	18H5	*	*	85.629	84.524	85.08	85.0777	0.451117	0.000228322	*
CNAG_02401	6 E6	*?	**	87.425	85.597	79.01	84.0107	3.6139	0.0123018	*
CNAG_06738	39B4	**	*	81.7308	81.04	88.23	83.6669	3.23888	0.00955017	*
CNAG_00293	13D5	*	*	84.7619	81.188	78.26	81.4033	2.65875	0.00503302	*
CNAG_05592	14A10	*	**	78.0952	79.4111	83.168	80.2248	2.14939	0.00292751	*
CNAG_06716	15H7	*	*	81.481	80	77.16	79.547	1.79289	0.00191002	*
CNAG_03765	5 E8	*?	*	79.0698	80.88	76.847	78.9323	1.64933	0.00152521	*
CNAG_05225	32H10	**	*	86.9347	75.113	73.977	78.6749	5.85893	0.0178657	*
CNAG_01050	17B11	*?	*?	72.8507	77.227	83.82	77.9659	4.50858	0.0101495	*
CNAG_03652	29F7	***	**	83.333	70.614	73.977	75.9747	5.38122	0.0120889	*
CNAG_01825	24D3	*	*	73.3945	76.777	77.39	75.8538	1.75693	0.00131835	*
CNAG_06997	39G3	**	**	69.7115	79.62	76.96	75.4305	4.18719	0.00710653	*
CNAG_00761	19F8	*?	*	67.7885	72.5111	71.3	70.5332	2.0028	0.00115093	*
CNAG_03020	27G11	*	*	76.389	65.873	67.018	69.76	4.71066	0.0059583	*
CNAG_03362	14F4	**	*	69.0583	67.326	70.11	68.8314	1.14783	0.000338703	*
CNAG_04108	7B1	*?	*	65.2174	75.49	65.06	68.5891	4.88007	0.0059273	*
CNAG_02196	25 E1	*?	*	74.3119	73.039	58.07	68.4736	7.37482	0.0131433	*
CNAG_04388	10A4	*	*	80.2817	63.318	60.93	68.1766	8.61496	0.0173719	*
CNAG_06134	1H11	*	*	62.1005	79.14	62.74	67.9935	7.8861	0.0145192	*
CNAG_05926	37B3	*?	*	72.8643	62.2549	61.71	65.6097	5.13458	0.00548141	*
CNAG_00519	6A3	**	****	97.47	91.75	92.9	94.04	2.4704
CNAG_07334	17F6	*?	*?	106.7	94.9	98.23	99.9433	4.96734
CNAG_00404	19B3	***	***	96.5	96.86	96.9	96.7533	0.179877
CNAG_00472	21E8	*?	***?	95.5	90.19	80.97	88.8867	6.00301
CNAG_02992	27F10	**?	****	97	94.9	98.369	96.7563	1.42666
CNAG_03431	1C5	*?	****	94.9772	97.23	93.36	95.1891	1.58701
CNAG_00514	1E4	*?	****	93.1507	97.69	82.74	91.1936	6.25824
CNAG_04792	1H6	*?	****	96.347	99.539	96	97.2953	1.59282
CNAG_05668	2A8	**	*	96.8037	104.608	97.3	99.5706	3.56777
CNAG_02801	2B7	*	**	94.0639	93.02	84.82	90.6346	4.1336
CNAG_05915	4A9	*?	*	102.791	94.418	96.88	98.0296	3.51346
CNAG_04398	4B10	*?	*	102.791	105.52	95.98	101.43	4.01174
CNAG_03525	6B11	**	*	95.3488	105.52	100	100.29	4.15741
CNAG_00165	6F12	***	*	88.1423	95.81	95.08	93.0108	3.45541
CNAG_06439	8E7	****	****	104.695	99.54	97.51	100.582	3.02426
CNAG_04944	9C7	****	*	107.042	100.46	99.41	102.304	3.3777
CNAG_03370	10F6	*	***	100.939	96.85	80.65	92.813	8.76104
CNAG_00707	12H11	***	***	99.0476	104.14	91.51	98.2325	5.18829
CNAG_01272	12H12	****	***	100	91.6	103	98.2	4.82494
CNAG_05558	15G6	****	****	90.419	94.65	94.5	93.1897	1.96011
CNAG_03388	16A5	***	*	95.0673	98.94	95.294	96.4338	1.7746
CNAG_01171	16E1	***	*	94.6188	90.04	103.31	95.9896	5.50348
CNAG_07458	17G12	*?	**	89.6861	100.23	97.15	95.6887	4.42681
CNAG_01148	17G4	*?	***?	106.7	94.9	98.23	99.9433	4.96734
CNAG_00889	19D12	*?	****	96	95.69	97.35	96.3467	0.720663
CNAG_01210	22F12	*	***	97.7064	94.46	98.5	96.8888	1.74772
CNAG_02458	26C7	****	***?	98.9	96	92.95	95.95	2.42933
CNAG_02583	26F6	**?	***?	105.556	90.873	99.53	98.653	6.0263
CNAG_02594	26F11	****	*	93.1193	97	93	94.3731	1.85814
CNAG_03162	28C2	****	****	97.47	88.43	98.36	94.7533	4.48601
CNAG_03174	28C6	*?	*?	100	104.02	86.34	96.7867	7.56702
CNAG_03269	28E1	**	**	97.807	94.737	88.847	93.797	3.7178
CNAG_03825	30A12	****	****	103.509	98.515	102.31	101.445	2.12863
CNAG_07873	34A4	**	**	97.318	99.123	105.09	100.51	3.3211
CNAG_04290	35B9	**	***	75.37	71.64	86.41	77.8067	6.27116
CNAG_05804	36G8	*?	****	92.337	92.361	98	94.2327	2.66392
CNAG_06024	37C9	*?	**?	93.9	93	96.739	94.5463	1.59339
CNAG_06873	39E6	***	***	100.481	98.99	97.16	98.8769	1.35805
CNAG numbers of the deleted genes are given
Position refers to the position in the Madhani Plate - Plate number is followed by the position on the plate
SA: Results of the Spot Assay in the initial screen (Rep1 and Rep2): * - no growth, ** - severe inhibiiton, *** - weak inhibition, **** - similar to Wild type control, ? - result was not certain
TmaxR - results of the three reps of the temperature gradient assay, star indicates that the result was statistically significant (p equal or less than 0.05)
Highlighted in blue is the group of strains that were also significanlty affected by inhibition of calcineurin - together with strains highlighted in yellow, these strains were tested for septin localization and synthetic lethal interaction with the lack of septins

## Sheet: CsA and FK506 assays
CNAG Number	Position	FK506 (SDA)	FK506 (LGA)	FK506 (TGA)	FK506 (SA)	CsA (TGA) Rep1	CsA (TGA) Rep2	CsA (TGA) Rep3	Average	St. dev	T Test
CNAG_02270	9C9				****	0
CNAG_03567	16D8	* elongated			**	0
CNAG_01918	13F1	* elongated			*	0
CNAG_01870	24 E7				*	0
CNAG_01126	3H2		*		*	3.68	0	0	1.22667	1.73477
CNAG_05794	36G5	* elongated		0	*?	0
CNAG_02891	19C6		*		*?	0
CNAG_07636	17D2	* elong + enlarged		0	*?	0	0	0
CNAG_04124	7C5			20	***	0	0	0
CNAG_00888	15G1	****			****	0
CNAG_01647	33 E9	**		0	**	0
CNAG_05791	36G4		*		*?	0
CNAG_01740	cdc12Δ	*	*	NA	NA	0	0	0	0	NA	NA		Two tailed T-test
CNAG_03584	29D3				**	98.95	92.638	98.837	95.7375	3.0995	0.200128		0.400255
CNAG_02930	6 E12				****	94.44	96.786	95.937	95.721	0.969853	0.0123685	*	0.0247369	*
CNAG_06648	18C3			0	**	58.6	76.82	70.88	68.8	7.58691	0.01413	*	0.0282582	*
CNAG_02822	7D7				****	111.67	105.336	103.736	106.914	3.42585	0.0519819		0.103964
CNAG_00438	21D8			79	*	68.81	65.965	68.81	67.8617	1.34115	0.000434789	*	0.000869578	*
CNAG_01536	23F8				****	81.72	99.46	86.2	89.1267	7.53219	0.0889836		0.177967
CNAG_00668	7D8	***		13	*?	115	108.228	104.116	109.115	4.48739	0.051418		0.102836
CNAG_04283	8D5				****	79.56	83.626	87.745	83.6437	3.34154	0.0101186	*	0.0202371	*
CNAG_00137	4G3				****	85.88	111.36	100	99.08	10.4225	0.456036		0.912071
CNAG_05277	13G2	****			****	97.92	99.415	97.093	98.1427	0.960939	0.0559155		0.111831
CNAG_03079	4C4				****	71.597	75.438	72.674	73.2363	1.61771	0.000910883	*	0.00182177	*
CNAG_05843	0H5	****		75	**	43.037	64.705	53.52	53.754	8.84747	0.00890643	*	0.0178129	*
CNAG_04514	7D6				****	80.36	75.35	87.23	80.98	4.86976	0.0156242	*	0.0312485	*
CNAG_03008	27G8				*	84.02	100	101.41	95.1433	7.88642	0.237815		0.47563
CNAG_03665	18H5			65	**	92.96	88.076	92.96	91.332	2.30234	0.0167561	*	0.0335122	*
CNAG_02401	6 E6	****		83	****	79.01	71.511	84	78.1737	5.13279	0.0132774	*	0.0265549	*
CNAG_06738	39B4				****	82.2	103.78	100	101.89	1.89	0.25		0.5
CNAG_00293	13D5				***	43.13	49.397	48.515	47.014	2.76991	0.000681803	*	0.00136361	*
CNAG_05592	14A10				****	82.5	97.88	107	95.7933	10.1103	0.307925		0.615849
CNAG_06716	15H7	****		74	****	65.18	67.64	70.4	67.74	2.13223	0.00108858	*	0.00217715	*
CNAG_03765	5 E8				****	87.59	98.59	100	95.3933	5.54773	0.180581		0.361162
CNAG_05225	32H10				****	75.73	103.03	95.588	99.309	3.721	0.441555		0.883109
CNAG_01050	17B11	****			*?	77.5	96.47	100.7	91.5567	10.0885	0.179095		0.358189
CNAG_03652	29F7			90	***	88.6	84.705	80.98	84.7617	3.11111	0.0101058	*	0.0202116	*
CNAG_01825	24D3				***	70	100	94.85	88.2833	13.0981	0.166645		0.33329
CNAG_06997	39G3				****	56.1	87.89	84.55	86.22	1.67	0.0383888	*	0.0767776
CNAG_00761	19F8	****			***	70.55	86.62	88.65	87.635	1.015	0.0260705	*	0.052141
CNAG_03020	27G11			81	*	97.63	99.415	97.63	98.225	0.841457	0.0481968	*	0.0963937
CNAG_03362	14F4	****			***	75	50.3	77.45	67.5833	12.262	0.032339	*	0.064678
CNAG_04108	7B1				****	22.08	11.44	28.21	20.5767	6.92836	0.00189162	*	0.00378325	*
CNAG_02196	25 E1				***	28.83	16.265	31.188	25.4277	6.55011	0.00191769	*	0.00383537	*
CNAG_04388	10A4				****	74.23	74.269	84.313	77.604	4.74401	0.0108534	*	0.0217069	*
CNAG_06134	1H11				***	92.7	94.035	90.221	92.3187	1.58023	0.0102562	*	0.0205123	*
CNAG_05926	37B3				**?	58.57	84.09	83.08	83.585	0.505	0.00978957	*	0.0195791	*
CNAG_00519	6A3		*		**	21.81	26.506	44.55	31.33		0.0102	*
CNAG_07334	17F6		*		*?	80
CNAG_00404	19B3		**		*	78.14
CNAG_00472	21E8		**? Did not grow well even in YPD		*	72.84
CNAG_02992	27F10		*		*	35.76	42.77
CNAG_03431	1C5				****	97.7
CNAG_00514	1E4				****	93.67
CNAG_04792	1H6				****	93.67
CNAG_05668	2A8				****	97.05
CNAG_02801	2B7	***			***	101.01
CNAG_05915	4A9				****	102.52
CNAG_04398	4B10				***	93.52
CNAG_03525	6B11				****	95.29
CNAG_00165	6F12				****	102.52
CNAG_06439	8E7				****	98.81	99.415	92.44	96.67		0.2893
CNAG_04944	9C7				****	93.67
CNAG_03370	10F6				****	40.58	50.2024	54.9	48.67		0.0063	*
CNAG_00707	12H11				***	87.73	98.255	97.714	94.67		0.2507
CNAG_01272	12H12				***	106.56
CNAG_05558	15G6	****		82	****	70.37	72.09	84.4	75.33		0.03	*
CNAG_03388	16A5				****	104.66
CNAG_01171	16E1				****	92.54
CNAG_07458	17G12				**?	91.71
CNAG_01148	17G4		*		**?	99
CNAG_00889	19D12		***		*	95
CNAG_01210	22F12				***	99.408	92.638	98.837	97		0.2724
CNAG_02458	26C7		***		*	0	0
CNAG_02583	26F6			76	**?	99.43
CNAG_02594	26F11				**?	99.408	99.415	97.093	98.33		0.1296
CNAG_03162	28C2		***		*?	100.52
CNAG_03174	28C6		*		*?	73.96	80.368	70.348	74.67		0.0129	*
CNAG_03269	28E1			100	*?	84.61	105.37	95.977	95.33		0.8069
CNAG_03825	30A12			102	***	89.24
CNAG_07873	34A4	** elongated		94	*	103.01
CNAG_04290	35B9		*? Also v poor growth in YPD		*	88.02
CNAG_05804	36G8	* some filamentous protrusions		89	*?	87.03	78.73	77.42	81		0.0249	*
CNAG_06024	37C9		*		*?	89.58
CNAG_06873	39E6				****	98.43
SDA - Spot dilution gowth assay:
LGA - liquid growth assay
TGA - temperature gradient assay
SA - Spot growth assay - the initial screen
* - no visible growth
** - some growth visible but significant inhibition observed
*** - visible inhibition of growth but not much worse than the wild type
**** - no inhibition of growth observed - grows similar to wild type
Numbers represent percentage of Tmax measured for the wild type reference strain (TmaxR) - number 0 indicates no visible grwth even at ~ 25C (ambient temperature).

## Sheet: Other phenotypic tests
CNAG Number	Position	Fluconazole	SDS	Congo RED	Cell separation deffect	Septin localization	Synthetic lethality with septin
CNAG_02270	9C9	Sensitive	Sensitive	Not sensitive	Not affected	Not affected	No problem
CNAG_03567	16D8	Not sensitive	Not sensitive	Not sensitive	Affected	Not affected	Lethal
CNAG_01918	13F1	Not sensitive	Sensitive	Not sensitive	Affected	Disturbed	No problem
CNAG_01870	24 E7	Sensitive	Sensitive	Not sensitive	Not affected	Not affected	No problem
CNAG_01126	3H2	Not sensitive	Sensitive	Not sensitive	Affected	Not affected	Lethal
CNAG_05794	36G5	Not sensitive	Not sensitive	Sensitive	Affected	No data	Fail to mate, no hypha
CNAG_02891	19C6	Sensitive	Sensitive	Not sensitive	Not affected	Not affected	No problem
CNAG_07636	17D2	Not sensitive	Sensitive	Sensitive	Affected	Disturbed	Lethal
CNAG_04124	7C5	Not sensitive	Not sensitive	Not sensitive	Affected	Not affected	No problem
CNAG_00888	15G1	Not sensitive	Sensitive	Not sensitive	Not affected	Not affected	Lethal
CNAG_01647	33 E9	Sensitive	Sensitive	Not sensitive	Not affected	Disturbed	Lethal
CNAG_05791	36G4	Not sensitive	Sensitive	Not sensitive	Not affected	Not affected	Lethal
CNAG_03584	29D3	Not sensitive	Not sensitive	Not sensitive	Not affected	No data	No data
CNAG_02930	6 E12	Not sensitive	Not sensitive	Not sensitive	Not affected	No data	No data
CNAG_06648	18C3	Sensitive	Not sensitive	Not sensitive	Affected	Not affected	No problem
CNAG_02822	7D7	Not sensitive	Not sensitive	Not sensitive	Not affected	No data	No data
CNAG_00438	21D8	Sensitive	Not sensitive	Not sensitive	Not affected	No data	No data
CNAG_01536	23F8	Not sensitive	Not sensitive	Not sensitive	Not affected	No data	No data
CNAG_00668	7D8	Not sensitive	Not sensitive	Not sensitive	Not affected	No data	No data
CNAG_04283	8D5	Sensitive	Not sensitive	Not sensitive	Affected	No data	No data
CNAG_00137	4G3	Sensitive	Not sensitive	Not sensitive	Affected	No data	No data
CNAG_05277	13G2	Not sensitive	Not sensitive	Not sensitive	Affected	No data	No data
CNAG_03079	4C4	Not sensitive	Not sensitive	Not sensitive	Affected	No data	No data
CNAG_05843	0H5	Sensitive	Sensitive	Not sensitive	Affected	Not affected	No problem
CNAG_04514	7D6	Sensitive	Sensitive	Sensitive	Not affected	No data	No data
CNAG_03008	27G8	Not sensitive	Not sensitive	Not sensitive	Not affected	No data	No data
CNAG_03665	18H5	Not sensitive	Not sensitive	Not sensitive	Affected	No data	No data
CNAG_02401	6 E6	Partially sensitive	Sensitive	Not sensitive	Affected	No data	No data
CNAG_06738	39B4	Not sensitive	Not sensitive	Not sensitive	Affected	No data	No data
CNAG_00293	13D5	Not sensitive	Sensitive	Not sensitive	Not affected	No data	No data
CNAG_05592	14A10	Not sensitive	Not sensitive	Not sensitive	Affected	No data	No data
CNAG_06716	15H7	Not sensitive	Sensitive	Not sensitive	Affected	No data	No data
CNAG_03765	5 E8	Not sensitive	Not sensitive	Not sensitive	Not affected	No data	No data
CNAG_05225	32H10	Not sensitive	Not sensitive	Not sensitive	Not affected	No data	No data
CNAG_01050	17B11	Sensitive	Sensitive	Not sensitive	Not affected	No data	No data
CNAG_03652	29F7	Not sensitive	Not sensitive	Not sensitive	Affected	No data	No data
CNAG_01825	24D3	Not sensitive	Not sensitive	Not sensitive	Affected	No data	No data
CNAG_06997	39G3	Not sensitive	Not sensitive	Not sensitive	Affected	Not affected	No problem
CNAG_00761	19F8	Not sensitive	Not sensitive	Not sensitive	Not affected	No data	No data
CNAG_03020	27G11	Not sensitive	Not sensitive	Not sensitive	Not affected	No data	No data
CNAG_03362	14F4	Not sensitive	Not sensitive	Not sensitive	Not affected	No data	No data
CNAG_04108	7B1	Not sensitive	Not sensitive	Not sensitive	Affected	Not affected	No problem
CNAG_02196	25 E1	Not sensitive	Not sensitive	Not sensitive	Affected	Disturbed	No problem
CNAG_04388	10A4	Not sensitive	Not sensitive	Not sensitive	Not affected	No data	No data
CNAG_06134	1H11	Not sensitive	Not sensitive	Not sensitive	Not affected	No data	No data
CNAG_05926	37B3	Not sensitive	Not sensitive	Not sensitive	Not affected	Not affected	No problem

## Sheet: Orthologs
	C. neoformans	S. cerevisiae				S. pombe				A. fumigatus				U. maydis
CNAG Number	Name	Ref number	Name	Q. cover	% identity	Ref number	Name	Q. cover	% identity	Ref number	Name	Q. cover	% identity	Ref number	Name	Q. cover	% identity
CNAG_02270	homoserine O-acetyltransferase	NP_014122.1	homoserine O-acetyltransferase	0.41	0.3116	NP_595166.1	putative homoserine O-acetyltransferase	0.99	0.488	EDP51603.1	homoserine O-acetyltransferase	0.99	0.5105	XP_011392411.1	hypothetical protein	0.99	0.5749
CNAG_03567	AGC/NDR protein kinse	NP_014238.3	CBK1	0.83	0.6004	NP_593165.1	Orb6; serine/threonine protein kinase	0.83	0.6047	EDP50552.1	serine/threonine protein kinase, putative	0.82	0.519	XP_011391264.1	Ukc1p protein kinase	0.85	0.7169
CNAG_01918	cytoskeletal regulatory protein binding protein	NP_013423.1	Bud6p	0.59	0.2803	NP_594302.2	actin-interacting protein 3	0.32	0.2754	EDP56200.1	Bud6/Aip3	0.54	0.2749	XP_011388054.1	hypothetical protein	0.23	0.5391
CNAG_01870	electron transfer flavoprotein beta subunit	NP_011723.1	Cir1p	0.95	0.5019	NP_593913.1	putative electron transfer flavoprotein alpha subunit	0.97	0.4692	EDP51477.1	electron transfer flavoprotein, beta subunit, putative	0.97	0.5606	XP_011386763.1	putative electron transfer flavoprotein beta chain	0.99	0.5846
CNAG_01126	guanine nucleotide exchange protein	NP_010454.3	SEC7	0.86	0.3861	NP_594555.1	Sec7 domain-containing protein sec72	0.72	0.4027	EDP48410.1	Sec7 guanyl nucleotide exchange factor	0.92	0.4354	XP_011391060.1	putative Arf family guanine nucleotide exchange factor	0.9	0.5323
CNAG_05794	MOB2/mps1 binder	NP_116618.1	Mob2p	0.85	0.4633	NP_587851.1	Mob2; protein kinase activator	0.88	0.4688	EDP56153.1	Mob2	0.2741	0.2741	XP_011387502.1	hypothetical protein	0.98	0.5128
CNAG_02891	endoplasmic reticulum protein	NP_014928.1	RDL1 thiosulfate sulfurtransferase	0.59	0.3585	NP_594343.2	Fmp31; putative protein phosphatase	0.75	0.3676	EDP55739.1	Rhodanese domain protein	0.55	0.4175	XP_011390863.1	hypothetical protein	0.67	0.5041
CNAG_07636	protoplast regeneration and killer toxin resistance protein	NP_009492.1	Skt5p	0.86	0.3706	NP_592847.1	Chr3; putative chitin synthase regulatory factor-like	0.6	0.4223	EDP48751.1	Chs3; putative chitin synthase activator ,	0.85	0.4871	XP_011389792.1	hypothetical protein	0.75	0.69
CNAG_04124	hypothetical protein
CNAG_00888	CNB1	NP_012731.1	CNB1	0.98	0.6105	NP_588476.1	putative calcineurin regulatory subunit B	0.98	0.6105	EDP47532.1	CalA	0.94	0.7349	XP_011387312.1	putative calcineurin regulatory subunit B	1	0.7771
CNAG_05791	ZDS3	NP_013598.1	Zds2p	0.06	0.4143	NP_594632.1	Zds1; putative zds family phosphatase type A regulator	0.33	0.363	EDP49360.1	Zds1; putative telomere silencing protein Zds1,	0.27	0.3092	XP_011389258.1	hypothetical protein	0.13	0.4104
CNAG_01647	SEC66	NP_009730.3	SEC66; Sec63 complex subunit	0.65	0.2722	NP_595471.1	putative translocation subcomplex subunit Sec66	0.6	0.3949	EDP48880.1	Sec66; translocation protein	0.88	0.3893	XP_011389276.1	hypothetical protein	0.65	0.5562
CNAG_03584	Prp8 binding protein	NP_015504.1	PRP4; U4/U6-U5 snRNP complex subunit	0.8	0.2727	NP_596835.1	Spf38; splicing factor	98%	0.3631	EDP48173.1	U5 snRNP complex subunit, putative	0.98	0.4355	XP_011387474.1	putative U5 snRNP-specific protein	0.97	44.74%
CNAG_02930	hypothetical protein					NP_593856.1	uncharacterized protein SPAC7D4.03c	0.28	0.2078	EDP52683.1	conserved hypothetical protein	0.23	0.2311	XP_011388294.1	hypothetical protein	0.5	0.2983
CNAG_06648	RTF1; RNA polymerase-associated protein	NP_011270.1	Rtf1p	0.57	26.88%	NP_595507.1	putative RNA polymerase II-associated Paf1 complex protein	0.7	0.2687					XP_011392102.1	hypothetical protein	0.63	0.2366
CNAG_02822	hypothetical protein
CNAG_00438	hypothetical protein
CNAG_01536	myosin heavy chain	NP_011888.1	myosin 1	0.67	0.3919	NP_588114.1	myo2; myosin II heavy chain	0.83	39.09%	EDP51613.1	myosin type II heavy chain, putative	0.92	0.3969	XP_011389697.1	hypothetical protein	0.88	0.4877
CNAG_00668	hypothetical protein	NP_012149.1	PRM5; pheromone-regulated protein	0.09	0.4286					EDP56599.1	SH3 domain protein	0.07	0.4138
CNAG_04283	integral membrane protein	NP_015103.1	flavin adenine dinucleotide transporter	0.74	0.2478	NP_594489.1	Pkd2; TRP-like ion channel	0.74	0.2278	EDP54262.1	DUF907 domain protein	0.76	0.2624	XP_011388364.1	hypothetical protein	0.77	0.3091
CNAG_00137	hypothetical protein													XP_011385999.1	hypothetical protein	0.72	0.4315
CNAG_05277	vesicle-associated membrane protein 4	NP_014972.3	SNC2; SNAP receptor	0.81	0.6061	NP_594120.1	synaptobrevin family receptor	0.78	0.6804	EDP47688.1	Snc2; SNARE protein , putative	0.8	0.7041	XP_011390059.1	putative SNAP receptor	0.91	0.6818
CNAG_03079	hypothetical protein	NP_009973.1	Per1p	0.83	0.2923	NP_593834.1	putative GPI-phospholipase A2 activity regulator	0.8	0.3397	EDP55956.1	Mn2+ homeostasis protein (Per1), putative	0.86	0.3194	XP_011391704.1	hypothetical protein	0.84	0.2906
CNAG_05843	translation initiation factor 4E	NP_014502.1	eIF4E	0.29	0.3353	NP_595451.1	eIF4E 4F complex subunit	0.34	0.3518	EDP51167.1	eIF4E3, putative	0.3	0.3657	XP_011389432.1	hypothetical protein	0.32	0.3763
CNAG_04514	CMGC/MAPK protein kinase	NP_011895.1	SLT2; mitogen-activated serine/threonine-protein kinase	0.85	0.6332	NP_595289.1	MAP kinase Pmk1	0.87	0.6273	EDP50723.1	MAP kinase MpkA	0.84	0.6787	XP_011386664.1	SLT2; putative mitogen-activated serine/threonine-protein kinase	0.89	0.7088
CNAG_03008	hypothetical protein
CNAG_03665	DDX35; ATP-dependent RNA helicase	NP_010929.3	PRP22; DEAH-box ATP-dependent RNA helicase	0.95	0.4635	NP_593253.1	Prp22; ATP-dependent RNA helicase	0.93	0.4839	EDP56160.1	ATP dependent RNA helicase, putative	0.86	0.5356	XP_011390406.1	putative ATP dependent RNA helicase	0.93	0.5023
CNAG_02401	G patch domain-containing protein 1					NP_593626.1	RNA-binding protein	0.31	0.472	EDP56340.1	G-patch domain protein, putative	0.79	0.3251	XP_011387014.1	hypothetical protein	0.82	0.3086
CNAG_06738	hypothetical protein
CNAG_00293	Ras-like protein	NP_014744.1	RAS1; Ras family GTPase	0.76	0.7333	NP_593579.1	GTPase Ras1	0.97	0.6606	EDP51858.1	RasA; RAS small monomeric GTPase	0.98	0.6941	XP_011386972.1	small G-protein Ras1	1	0.7752
CNAG_05592	potassium/sodium efflux P-type ATPase	NP_011348.1	PMR1; Ca(2+)/Mn(2+)-transporting P-type ATPase	0.98	0.3363	NP_595098.1	P-type calcium transport ATPase Pmr1	0.95	0.3357	EDP49241.1	endoplasmic reticulum calcium ATPase, putative	0.93	0.6365	XP_011388455.1	endoplasmic reticulum calcium transporter	0.99	0.6276
CNAG_06716	hypothetical protein	NP_010074.1	GLE1; nucleoporin	0.14	0.3684	NP_596424.1	Usp102; U1 snRNP-associated protein	0.78	0.3107	EDP49215.1	U1 small nuclear ribonucleoprotein A, putative	0.27	0.493	XP_011391945.1	hypothetical protein	0.94	35.37%
CNAG_03765	trehalose-phosphatase	NP_010359.1	TPS2; trehalose-phosphatase	0.62	0.4121	NP_594430.1	Tpp1; trehalose-6-phosphate phosphatase	0.75	0.3906	EDP53165.1	TPS2; alpha-trehalose-phosphate synthase subunit , putative	0.7	0.4776	XP_011389801.1	hypothetical protein	0.87	0.5528
CNAG_05225	bud site selection protein 31	NP_009990.1	BUD31; U2 snRNP complex subunit	1	0.5823	NP_595965.1	G10 protein	1	0.6351	EDP51312.1	Cwf14; cell cycle control protein , putative	1	0.6779	XP_011388785.1	putative G10 protein	1	0.75
CNAG_01050	hypothetical protein					NP_595999.1	Pvg1; putative galactosylxylosylprotein 3-beta-galactosyltransferase	0.46	0.2418					XP_011388910.1	hypothetical protein	0.45	0.2642
CNAG_03652	dynactin 6									EDP55470.1	conserved hypothetical protein	0.3	0.4286
CNAG_01825	hypothetical protein	NP_009962.2	Snt1p	0.34	0.3
CNAG_06997	tRNA-dihydrouridine synthase 3	NP_013505.4	DUS3 ; tRNA dihydrouridine synthase	0.87	0.3716	NP_594572.1	Dus3	0.89	0.3813	EDP56712.1	tRNA dihydrouridine synthase, putative	0.97	0.3649	XP_011392257.1	hypothetical protein	0.76	0.4725
CNAG_00761	coiled-coil domain-containing protein 12					NP_588560.1	protein Cwf18	0.76	0.3409	EDP56174.1	conserved hypothetical protein	0.76	0.3733	XP_011392403.1	Coiled-coil domain-containing protein 12 (CCDC12)	0.72	0.4603
CNAG_03020	hypothetical protein									EDP50161.1	conserved hypothetical protein	0.8	0.2515	XP_011391939.1	hypothetical protein	0.52	0.4082
CNAG_03362	hypothetical protein
CNAG_04108	pyruvate dehydrogenase kinase	NP_012222.1	PKP1 protein kinase	0.58	0.2701	NP_593879.1	Pkp1 kinase[pyruvate dehydrogenase (acetyl-transferring)]	0.98	0.4497	EDP54703.1	pyruvate dehydrogenase kinase	0.98	0.5824	XP_011391997.1	hypothetical protein	0.99	0.5553
CNAG_02196	sepin CDC11	NP_012610.1	septin CDC11	0.95	0.4508	NP_001342704.1	septin Spn3	0.94	0.5378	EDP51597.1	septin AspA	0.91	0.6132	XP_011389909.1	septin 3	0.97	0.723
CNAG_04388	Fe-Mn family superoxide dismutase	NP_011872.1	SOD2; superoxide dismutase	0.98	0.431	NP_594089.1	putative manganese superoxide dismutase	0.87	0.5765	EDP56690.1	MnSOD; Mn superoxide dismutase	0.88	0.535	XP_011388737.1	putative superoxide dismutase SOD2	1	0.6167
CNAG_06134	hypothetical protein
CNAG_05926	U2 small nuclear ribonucleoprotein A'					NP_596725.1	putative U2 snRNP-associated protein Lea1	0.93	0.3504	EDP51836.1	small nuclear ribonucleoprotein U2, A'	0.95	0.3913	XP_011390931.1	hypothetical protein	0.92	0.3534

## Sheet: Genetic crosses with the cdc12 
CNAG	Plated spores	Germinated spores	DD
CNAG_00888	53	34	0
CNAG_01126	48	29	0
CNAG_01647	48	16	0
CNAG_01870	48	57	36
CNAG_01918	44	39	8
CNAG_02196	48	46	6
CNAG_02270	48	48	19
CNAG_02891	45	39	23
CNAG_03567	48	15	0
CNAG_04108	48	44	14
CNAG_04124	48	45	8
CNAG_05791	40	22	0
CNAG_05843	58	27	11
CNAG_05926	48	46	17
CNAG_06648	47	45	20
CNAG_06997	46	46	21
CNAG_07636	68	41	0
No more than 8 spores were dissected per basidium
DD - number of spores that germinated into viable double deletion mutants
